# Supplementary material for: Experimental Induction of Intracranial Aneurysms in Rats: A New Model Utilizing a Genetic Modification within the EDNRA Gene
Source: MDPI journal article supplement (doi:10.3390/brainsci12091239), 2022-09-14
Supplement: s1 [file s1]

## **Supplementary Materials**

### **Experimental Induction of Intracranial Aneurysms in Rats: A New Model Utilizing a Genetic Modification within the EDNRA Gene**

Tim Lampmann<sup>1,\*</sup>, Valeri Borger<sup>1</sup>, Jürgen Konczalla<sup>2</sup>, Suzana Gispert<sup>3</sup>, Georg Auburger<sup>3</sup>,  
Hartmut Vatter<sup>1</sup> and Erdem Güresir<sup>1</sup>

<sup>1</sup> Department of Neurosurgery, University Hospital Bonn, 53127 Bonn, Germany

<sup>2</sup> Department of Neurosurgery, University Hospital Frankfurt, 60528 Frankfurt am Main, Germany

<sup>3</sup> Experimental Neurology, Medical Faculty, Goethe University, 60590 Frankfurt am Main, Germany

\*Corresponding author: [tim.lampmann@ukbonn.de](mailto:tim.lampmann@ukbonn.de)

## **1. Supplementary Results**

### **1.1. Non-invasive blood pressure measurement**

BP was normally distributed for all groups at all time points except for EDNRA + HT at week 8 and WT\_CTL at week 12, as assessed by the Shapiro-Wilk test ( $\alpha = 0.05$ ).

Homogeneity of variances could be assumed for all time points (week 4:  $p = 0.166$ ; week 8:  $p = 0.392$ ; week 10:  $p = 0.186$ ; week 12:  $p = 0.102$ ).

BP was normally distributed for WT\_CTL at week 4, week 8 and week 10, but not for week 12, as assessed by the Shapiro-Wilk test ( $\alpha = 0.05$ ). Homoscedasticity could be assumed,  $\chi^2(5) = 3.26$ ,  $p = 0.661$ . There was no statistically significant difference for the time points,  $F(3, 36) = 0.55$ ,  $p = 0.651$ .

BP was normally distributed for EDNRA\_CTL at all time points as assessed by the Shapiro-Wilk test ( $\alpha = 0.05$ ). Homoscedasticity could be assumed,  $\chi^2(5) = 8.37$ ,  $p = 0.138$ . There was no statistically significant difference for the time points,  $F(3, 36) = 2.75$ ,  $p = 0.057$ .

BP was normally distributed for WT + HT at all time points as assessed by the Shapiro-Wilk test ( $\alpha = 0.05$ ). Homoscedasticity could be assumed,  $\chi^2(5) = 6.95$ ,  $p = 0.233$ . There was statistically significant difference for the time points,  $F(3, 18) = 7.96$ ,  $p = 0.001$ .

BP was normally distributed for EDNRA + HT at week 4, week 10 and week 12, but not for week 8, as assessed by the Shapiro-Wilk test ( $\alpha = 0.05$ ). Homoscedasticity could be assumed,  $\chi^2(5) = 2.66$ ,  $p = 0.755$ . There was no statistically significant difference for the time points,  $F(3, 24) = 1.28$ ,  $p = 0.306$ .

### **1.2. Immunofluorescence**

MGV was normally distributed for EDNRA + HT, but not for WT\_CTL and EDNRA\_CTL, as assessed by the Shapiro-Wilk test ( $\alpha = 0.05$ ).

Homogeneity of variances could not be assumed for MGV ( $p = 0.002$ ).

### **1.3. Functional investigation**

$E_{\max}$  was normally distributed for all groups as assessed by the Shapiro-Wilk test ( $\alpha = 0.05$ ).

$pD_2$  was normally distributed for WT\_CTL, WT + HT and EDNRA + HT, but not for EDNRA\_CTL, as assessed by the Shapiro-Wilk test ( $\alpha = 0.05$ ).

Homogeneity of variances could be assumed for  $E_{\max}$  and  $pD_2$  ( $p = 0.615$  and  $p = 0.365$ , respectively).

## 2. Supplementary Tables

**Table S1. Non-invasive blood pressure measurement: Means and SD of BP**

| Time point | Group      | Animals [N] | Mean [mmHg] | SD    |
|------------|------------|-------------|-------------|-------|
| Week 4     | WT_CTL     | 13          | 127.23      | 12.08 |
|            | EDNRA_CTL  | 13          | 136.92      | 10.95 |
|            | WT + HT    | 12          | 185.33      | 20.86 |
|            | EDNRA + HT | 17          | 203.00      | 17.93 |
| Week 8     | WT_CTL     | 13          | 165.62      | 36.36 |
|            | EDNRA_CTL  | 13          | 126.69      | 16.90 |
|            | WT + HT    | 11          | 131.23      | 11.51 |
|            | EDNRA + HT | 17          | 167.27      | 24.63 |
| Week 10    | WT_CTL     | 13          | 209.29      | 21.12 |
|            | EDNRA_CTL  | 13          | 162.06      | 40.06 |
|            | WT + HT    | 10          | 127.38      | 19.23 |
|            | EDNRA + HT | 17          | 131.77      | 12.29 |
| Week 12    | WT_CTL     | 13          | 166.20      | 23.49 |
|            | EDNRA_CTL  | 13          | 204.76      | 25.86 |
|            | WT + HT    | 7           | 160.6       | 39.35 |
|            | EDNRA + HT | 9           | 122.92      | 10.20 |

*N=number of samples; SD=standard deviation*

**Table S2. Immunofluorescence: Means and SD of MGv**

| Group      | Animals [N] | Images [N] | Mean | SD   |
|------------|-------------|------------|------|------|
| WT_CTL     | 9           | 32         | 8.63 | 3.65 |
| EDNRA_CTL  | 8           | 27         | 8.49 | 4.90 |
| WT + HT    | 3           | 21         | 9.45 | 2.06 |
| EDNRA + HT | 6           | 54         | 9.46 | 2.82 |

*N=number of samples; SD=standard deviation*

**Table S3. Functional investigation: Means and SD of  $E_{max}$**

| Group      | Measurements [N] | Mean   | SD    |
|------------|------------------|--------|-------|
| WT_CTL     | 9                | 85.12  | 17.24 |
| EDNRA_CTL  | 19               | 86.15  | 15.95 |
| WT + HT    | 11               | 101.75 | 23.84 |
| EDNRA + HT | 11               | 75.40  | 19.92 |

*N=number of samples; SD=standard deviation*

**Table S4. Functional investigation: Means and SD of  $pD_2$**

| Group      | Measurements [N] | Mean | SD   |
|------------|------------------|------|------|
| WT_CTL     | 9                | 7.79 | 0.27 |
| EDNRA_CTL  | 19               | 7.54 | 0.22 |
| WT + HT    | 11               | 7.78 | 0.33 |
| EDNRA + HT | 11               | 7.80 | 0.23 |

*N=number of samples; SD=standard deviation*

**Table S5. Functional investigation: Means and SD of single data points**

| <b>Group</b>      | <b>ET-1 concentration [M]</b> | <b>Measurements [N]</b> | <b>Mean</b> | <b>SD</b> |
|-------------------|-------------------------------|-------------------------|-------------|-----------|
| <b>WT_CTL</b>     | $10^{-11}$                    | 9                       | -1.91       | 2.02      |
|                   | $10^{-10}$                    | 9                       | -2.09       | 1.93      |
|                   | $10^{-9}$                     | 9                       | 0.30        | 3.34      |
|                   | $3 \times 10^{-9}$            | 9                       | 6.44        | 9.27      |
|                   | $10^{-8}$                     | 9                       | 33.68       | 13.04     |
|                   | $3 \times 10^{-8}$            | 9                       | 49.64       | 11.57     |
|                   | $10^{-7}$                     | 9                       | 85.12       | 17.24     |
|                   | $3 \times 10^{-7}$            | 9                       | 58.16       | 28.77     |
| <b>EDNRA_CTL</b>  | $10^{-11}$                    | 19                      | -1.43       | 4.24      |
|                   | $10^{-10}$                    | 19                      | -1.77       | 3.64      |
|                   | $10^{-9}$                     | 19                      | 1.52        | 4.31      |
|                   | $3 \times 10^{-9}$            | 19                      | 5.08        | 6.93      |
|                   | $10^{-8}$                     | 19                      | 23.31       | 13.65     |
|                   | $3 \times 10^{-8}$            | 19                      | 37.95       | 17.34     |
|                   | $10^{-7}$                     | 19                      | 86.15       | 15.95     |
|                   | $3 \times 10^{-7}$            | 19                      | 50.78       | 21.84     |
| <b>WT + HT</b>    | $10^{-11}$                    | 11                      | 1.69        | 1.87      |
|                   | $10^{-10}$                    | 11                      | 1.02        | 0.92      |
|                   | $10^{-9}$                     | 11                      | 2.10        | 5.47      |
|                   | $3 \times 10^{-9}$            | 11                      | 5.91        | 7.48      |
|                   | $10^{-8}$                     | 11                      | 39.52       | 22.35     |
|                   | $3 \times 10^{-8}$            | 11                      | 59.31       | 21.87     |
|                   | $10^{-7}$                     | 11                      | 101.75      | 23.84     |
|                   | $3 \times 10^{-7}$            | 11                      | 88.46       | 28.80     |
| <b>EDNRA + HT</b> | $10^{-11}$                    | 11                      | 3.36        | 4.58      |
|                   | $10^{-10}$                    | 11                      | 4.48        | 3.69      |
|                   | $10^{-9}$                     | 11                      | 7.22        | 10.13     |
|                   | $3 \times 10^{-9}$            | 11                      | 7.30        | 11.19     |
|                   | $10^{-8}$                     | 11                      | 28.40       | 13.02     |
|                   | $3 \times 10^{-8}$            | 11                      | 50.65       | 11.60     |
|                   | $10^{-7}$                     | 11                      | 73.21       | 23.79     |
|                   | $3 \times 10^{-7}$            | 11                      | 52.66       | 20.09     |

*N=number of samples; SD=standard deviation*
